# Supplementary material for: The Effect of Transformational Leadership on Exploratory and Exploitative Innovation: The Mediating Role of Entrepreneurial Orientation
Source: Research Square preprint supplement (doi:10.21203/rs.3.rs-7826827/v1), 2025-11-05
Supplement: Supplementary file 1 [file 7407a3d6bcbcdc654fdccbe7.docx]

**Table 1 Demographic Characteristics**

| Characteristics | Frequency | % |
| --- | --- | --- |
| Organisation Age  <10years  10-20 years 21-30 years  31-40 years  41-50years  >50years | 98  50  16  30  10  4 | 47.1  24  7.7  14.4  4.8  2 |
| Organization size  51--100 employees  101-200 employees  201-400 employees  401-800 employees  801 to1200 employees  >1200 employees | 23  49  90  33  12  1 | 11  23.5  43.2  16  5.7  0.48 |
| **Gender**    Male  Female | 123  85 | 59.1  40.9 |
| **Education status**    Certificate  Diploma  BA. degree  Masters  PhD. | 21  18  123  42  4 | 10  8.6  59.1  20.1  2 |
| **Work Experience**    < 1 year  Between 2 and 5 years  Between 6 and 10 years  >10 years | 12  88  74  34 | 5.7  42.3  35.5  16.3 |
| **Position/Function**  General Manager/CEO  Team leader/supervisor  Managing Director, Administrator | 89  65  54 | 43  31.2  26 |

**Table 2 Summary of Exploratory Factor Analysis Results**

|  | TL | EO | EXPRIIN | EXPLIIN |
| --- | --- | --- | --- | --- |
| KMO | 0.97 | 0.96 | 0.91 | 0.94 |
| Bartlett’s test chi-square | 3420.912 | 3350.101 | 1251.458 | 1782.039 |
| Df | 55 | 45 | 10 | 15 |
| Significance | .000 | .000 | .000 | .000 |

Note: TL: Transformational leadership; EO: Entrepreneurship orientation; EXPRIIN: Exploratory Innovation; EXPLIIN: Exploitative Innovation

**Table 3: Standardized loading and reliabilities for the measurement model**

| Construct/item | Std.loading | CR | AVE |
| --- | --- | --- | --- |
| **Transformational Leadership (TL)**  TL1: My leader makes others feel good to be around him/her  TL2: My leader makes others have complete faith in him/her  TL3: My leader make others are proud to be associated with him/her  TL4: My leader express his view with a few simple words what we could do.  TL5: My Leader provides appealing images about what we can do.  TL6: My leader develops others find meaning in their work.  TL7: My leader provide others to think about old problems in new ways.  TL8: My leader let others with new ways of looking at puzzling things  TL9: My leader get others to rethink ideas that they had never questioned before .  TL11: My leader let others know how he/she think they are doing.  TL12: My leader gives personal attention to others who seem rejected. | 0.86  0.91  0.94  0.93  0.92  0.93  0.91  0.92  0.9  0.93  0.88 | 0.96 | 0.83 |
| **Entrepreneurship Orientation (EO)**  EO1: In dealing with competitors, our company is very often the first to introduce products and administrative techniques.  EO3: Our firm introduce new products/services, administrative techniques, operating technologies in facing competitions.  EO4: In dealing with competitors, our firm typically initiates actions which competitors then respond to.  EO6: Our firm utilizes risky market opportunities.  EO7: Our firm experiments with new products.  EO8 When confronted with decision making situations involving uncertainty, our company adopts a bold strategy in order to maximise the probability of exploiting opportunities.  EO9: The firm aims to always be the first to introduce new products or services in the market.  EO10: Top management is willing to try new ways of doing things and seek  novelsolutions EO12: The firm always develops new processes.  EO13: The senior leadership promotes innovative thinking. | 0.91  0.93    0.89  0.94  0.95  0.93  0.95    0.93  0.90  0.91 | 0.97 | 0.85 |
| **Exploratory Innovation (EXPRIIN)**  EXPLI 1: Our company accepts demands that go beyond existing products and services  EXPLI 2: We experiment with new products and services in our local market.  EXPLI 4: We commercialize products and services that are completely new to our company.  EXPLI 5: We frequently utilize new opportunities in new markets. EXPLI 7: We regularly search for and approach new clients in new markets. | 0.84  0.95  0.96  0.92  0.87 | 0.94 | 0.82 |
| **Exploitative Innovation (EXPLIIN)**  EXPI1: Our company frequently refines the provision of existing products and services.  EXPI 2: We regularly implement small adaptations to existing products & services.  EXPI 3: We introduce improved, but existing products and services for our local market.  EXPI 4: We improve our provision’s efficiency of products and services  EXPI 5: We increase economies of scale in existing markets.  EXPI 7: Lowering costs of internal processes is an important objective. | 0.88  0.94  0.94  0.95  0.91  0.94 | 0.96 | 0.86 |

**Table 4 Discriminant validity of the measurement model**

| Construct | **TL** | **EO** | **EXPRIIN** | **EXPLIIN** |
| --- | --- | --- | --- | --- |
| **TL** | **0.91** |  |  |  |
| **EO** | 0.462 | **0.92** |  |  |
| **EXPRIIN** | 0.467 | 0.381 | **0.9** |  |
| **EXPLIIN** | 0.377 | 0.269 | 0.119 | **0.93** |

Note: TL: Transformational leadership; EO: Entrepreneurship orientation; EXPRIIN: Exploratory Innovation; EXPLIIN: Exploitative Innovation

**Table 5 Indices for Model Fit**

|  | CMIN/DF | p-value | GFI | AGFI | NFI | TLI | CFI | RMSEA |
| --- | --- | --- | --- | --- | --- | --- | --- | --- |
| Recommended |  | < 5 | ≥ 0.80 | ≥ 0.80 | > 0.9 | > 0.9 | > 0.90 | < 0.05 |
| CFA (measurement) | 1.37 | 000 | 0.844 | 0.821 | 0.94 | 0.982 | 0.983 | 0.042 |

**Table6 Standardized path coefficients**

| Hypothesis | Path | Path Coefficient | S.E | T-Value | P-value | Remark |
| --- | --- | --- | --- | --- | --- | --- |
| H1a  H1b  H2  H3a  H3b | TL EXPRIIN  TL EXPLIIN  TL EO  EO EXPRIIN  EO EXPLIIN | 0.37  0.32  0.46  0.21  0.12 | 0.098  0.101  0.087  0.073  0.075 | 5.079  4.226  6.956  3.000  1.631 | 0.000  0.000  0.000  0.003  0.104 | Supported  Supported  Supported  Supported  Not supported |

Note: TL: Transformational leadership; EO: Entrepreneurship orientation; EXPRIIN: Exploratory Innovation; EXPLIIN: Exploitative Innovation

**Table 7 Results of mediation Analysis**

| Hypothesis | Path coefficient | SE | t value | p value | 95% BCa CI | Result |
| --- | --- | --- | --- | --- | --- | --- |
| H4a : TL-EO –EXPRIIN | 0.131 | 0.055 | 2.3 | 0.006 | [ 0.039 -0.254] | Supported |
| H4b : TL-EO-EXPIIN | 0.074 | 0.051 | 1.45 | 1.119 | [-0.021-0.183] | Not Supported |

Note: TL: Transformational leadership; EO: Entrepreneurship orientation; EXPRIIN: Exploratory Innovation; EXPLIIN: Exploitative Innovation
